# Supplementary material
Source: PubMed Central journal article supplement (PMC4631951)
Supplement: supp_115.227389_JPET_227389_Supplementary_data.pdf [file supp_115.227389_JPET_227389_Supplementary_data.pdf]

**Supplementary data to:**

**Altered protein S-glutathionylation identifies a potential mechanism of resistance to acetaminophen-induced hepatotoxicity.**

***Journal of Pharmacology & Experimental Therapeutics***

David J. McGarry, Probir Chakravarty, C. Roland Wolf<sup>1</sup> and Colin J. Henderson<sup>1</sup>

Molecular Pharmacology Group, Medical Research Institute, Level 9, Jacqui Wood Cancer Centre, Dundee DD1 9SY, United Kingdom (DJM, CRW, CJH)

Bioinformatics & Biostatistics Group, Cancer Research UK London Research Institute, 44, Lincoln's Inn Fields, London, WC2A 3PX, UK (PC)

<sup>1</sup> Joint senior authors

**Table of contents**

Supplementary Figure 1. HO-1 densitometry in *Gstp1*<sup>WT</sup> and *Gstp1/2*<sup>-/-</sup> mice after acetaminophen administration.....3

Supplementary Figure 2. JNK phosphorylation in *Gstp1*<sup>WT</sup> and *Gstp1/2*<sup>-/-</sup> primary MEFs.....4

Supplementary Figure 3. Oxidised glutathione levels in *Gstp1*<sup>WT</sup> and *Gstp1/2*<sup>-/-</sup> mice in response to acetaminophen.....5

Supplementary Figure 4. Glutathione levels and protein S-glutathionylation in *Gstp1*<sup>WT</sup> and *Gstp1/2*<sup>-/-</sup> mice in response to buthionine sulfoximine.....6

Supplementary Table 1. nLC-MS/MS analysis of proteins identified as S-glutathionylated after acetaminophen treatment in *Gstp1*<sup>WT</sup> and *Gstp1/2*<sup>-/-</sup> mice.....7

Supplementary Table 2. Pathway and Process analysis of proteins specifically S-glutathionylated in *Gstp1/2<sup>-/-</sup>* mice, 40 minutes after acetaminophen treatment.....7

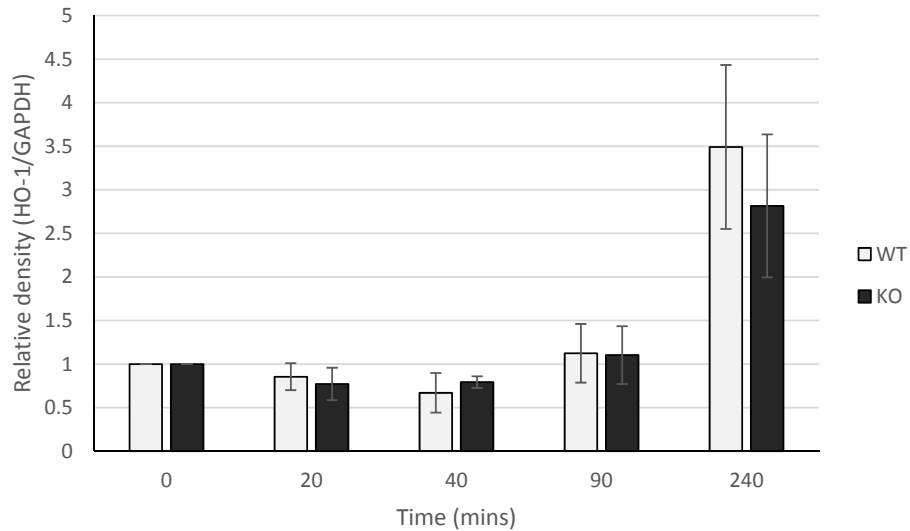

**Supplementary Figure 1. HO-1 densitometry in *Gstp1*<sup>WT</sup> and *Gstp1/2*<sup>-/-</sup> mice after acetaminophen administration.**

The graph provides densitometric analysis of HO-1 Western blot results as described in Figure 1C of the main text. Whole cell liver lysates (10 $\mu$ g) were prepared from *Gstp1*<sup>WT</sup> (WT) and *Gstp1/2*<sup>-/-</sup> (KO) male mice after a single oral dose of APAP (300mg/kg) and harvested at the time points shown. Lysates were analysed for HO-1 expression using Western blotting as described in Figure 1C of the main text. Densitometric analysis was performed using Multi Gauge V2.2 software (Fujifilm UK). HO-1 densitometry readings were normalised against GAPDH expression (n=3).

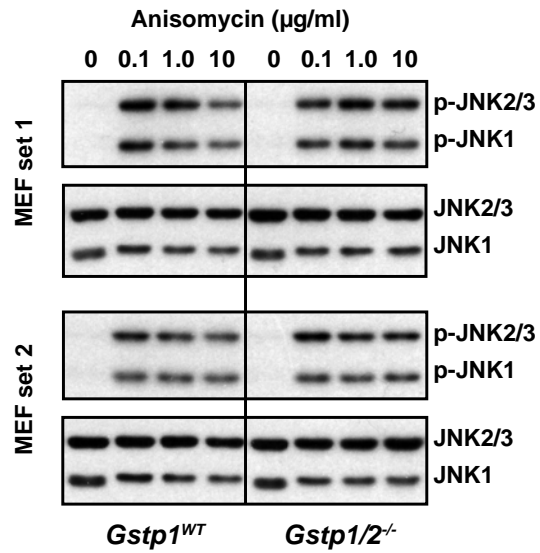

**Supplementary Figure 2. JNK phosphorylation in *Gstp1*<sup>WT</sup> and *Gstp1/2*<sup>-/-</sup> primary MEFs.**

Primary mouse embryonic fibroblasts (MEFs) isolated from two independent cohorts (sets) of *Gstp1*<sup>WT</sup> and *Gstp1/2*<sup>-/-</sup> mice were incubated with anisomycin at the doses described for 30 minutes. Lysates were then extracted and analysed (20μg lysate) by Western blotting.

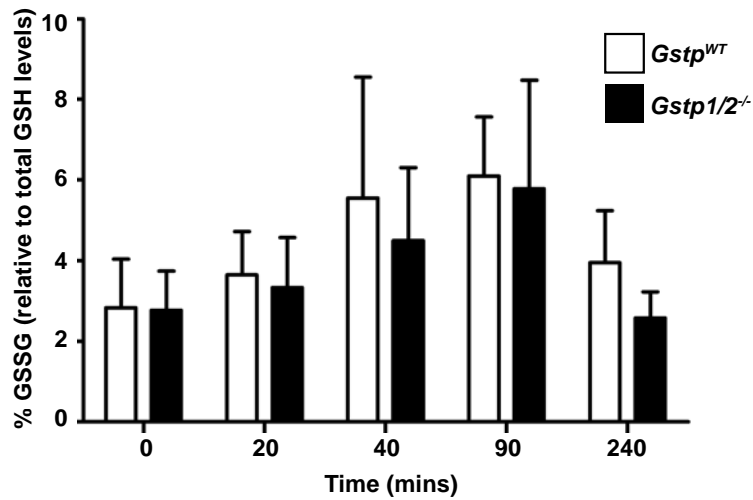

**Supplementary Figure 3. Oxidised glutathione levels in *Gstp1*<sup>WT</sup> and *Gstp1/2*<sup>-/-</sup> mice in response to acetaminophen.**

Male *Gstp1*<sup>WT</sup> and *Gstp1/2*<sup>-/-</sup> mice were administered a single oral dose of acetaminophen (APAP; 300mg/kg) and harvested at time points indicated. Livers were removed, washed in phosphate-buffered saline and analysed for oxidised glutathione levels as detailed in 'Materials and Methods' (n=8). Error bars show mean  $\pm$  standard deviation.

A

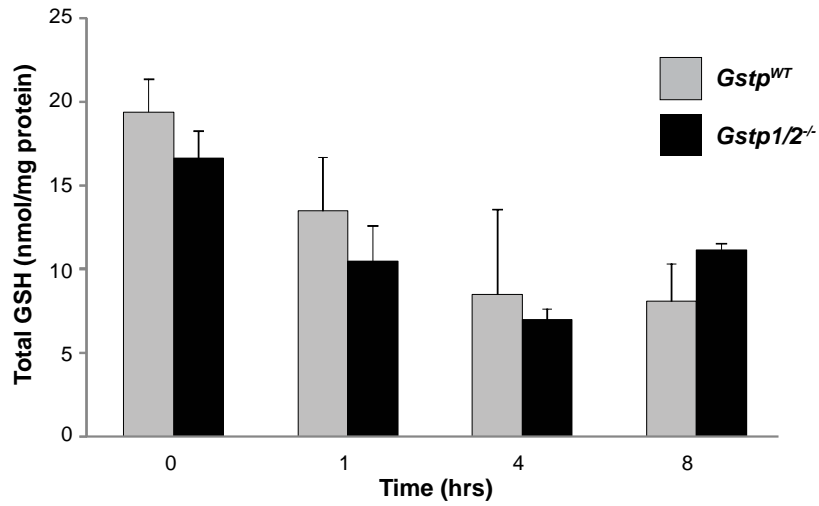

B

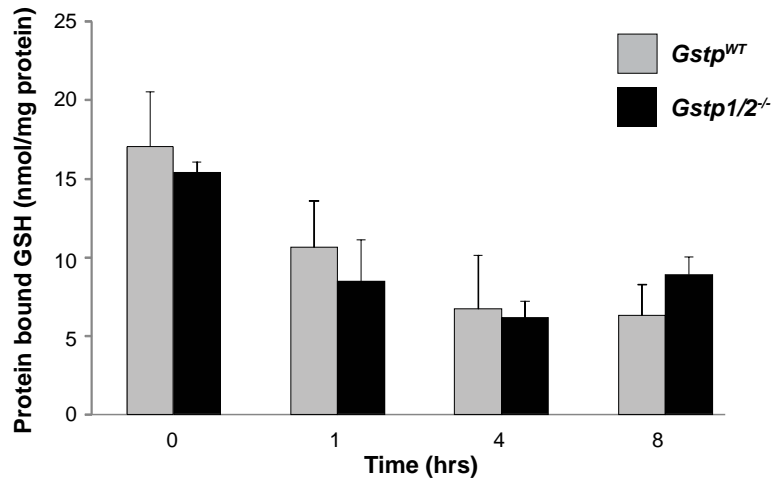

**Supplementary Figure 4. Glutathione levels and protein S-glutathionylation in *Gstp*<sup>WT</sup> and *Gstp1/2*<sup>-/-</sup> mice in response to buthionine sulfoximine.**

Male *Gstp*<sup>WT</sup> and *Gstp1/2*<sup>-/-</sup> mice were administered a single oral dose of buthionine sulfoximine (BSO; 0.9g/kg) and harvested at time points indicated. Livers were removed, washed in phosphate-buffered saline and analysed for total glutathione levels (A) and total levels of protein S-glutathionylation (B) as detailed in 'Materials and Methods'. Error bars show mean  $\pm$  standard deviation.

**Supplementary Table 1. nLC-MS/MS analysis of proteins identified as S-glutathionylated after acetaminophen treatment in *Gstp1*<sup>WT</sup> and *Gstp1/2*<sup>-/-</sup> mice.**

S-glutathionylated proteins were isolated from *Gstp1*<sup>WT</sup> and *Gstp1/2*<sup>-/-</sup> mice after a single dose of acetaminophen (APAP; 300mg/kg, 40 minutes) as described in Figure 4 and subjected to nLC-MS/MS analysis. Parameters for MS analysis are provided in the Table and under '*Materials and Methods*'.

**Supplementary Table 2. Pathway and Process analysis of proteins specifically S-glutathionylated in *Gstp1/2*<sup>-/-</sup> mice, 40 minutes after acetaminophen treatment.**

The table shows Metacore software analysis of enriched pathways and processes from proteins specifically S-glutathionylated in *Gstp1/2*<sup>-/-</sup> mice after APAP treatment (see Figure 4a). The 'adjusted p value' stated corrects for multiple testing using the Benjamini-Hocberg correction method as described under '*Materials and Methods*'. Pathways with an adjusted p value of less than 0.05 were deemed significant.
